# Supplementary material for: Nickel(II) Coordination Polymers Supported by Bis-pyridyl-bis-amide and Angular Dicarboxylate Ligands: Role of Ligand Flexibility in Iodine Adsorption
Source: MDPI journal article supplement (doi:10.3390/ijms23073603), 2022-03-25
Supplement: s1 [file s1]

## Supplementary materials

# Nickel(II) Coordination Polymers Supported by Bis-pyridyl-bis-amide and Angular Dicarboxylate Ligands: Synthesis, Structures and Iodine Adsorption

Wei-Te Lee, Tsung-Te Liao and Jhy-Der Chen\* 

Department of Chemistry, Chung-Yuan Christian University, Chung Li 32023, Taiwan  
[lku23y230230@gmail.com](mailto:lku23y230230@gmail.com) (W.-T.L.); [zxc0927808262@gmail.com](mailto:zxc0927808262@gmail.com) (T.-T.L.)

\* Correspondence: [jdchen@cycu.edu.tw](mailto:jdchen@cycu.edu.tw) (J.-D.C.); Tel.: +886-3-265-3351

**Figure S1.** Simulated and experimental PXRD patterns of **1**.

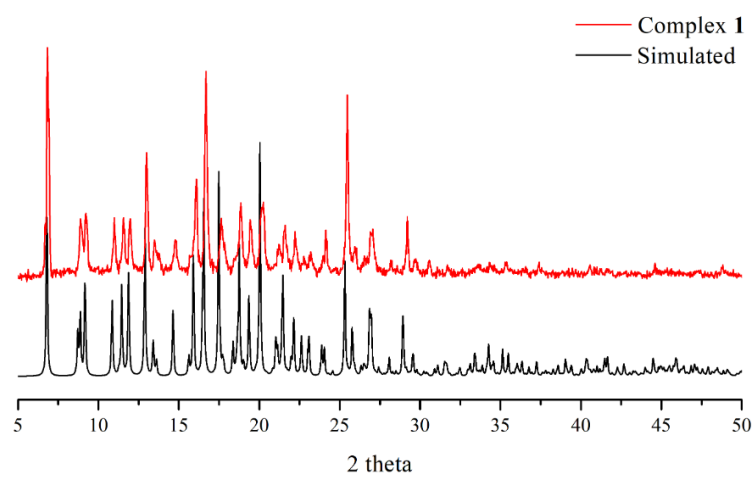

**Figure S2.** Simulated and experimental PXRD patterns of **2**.

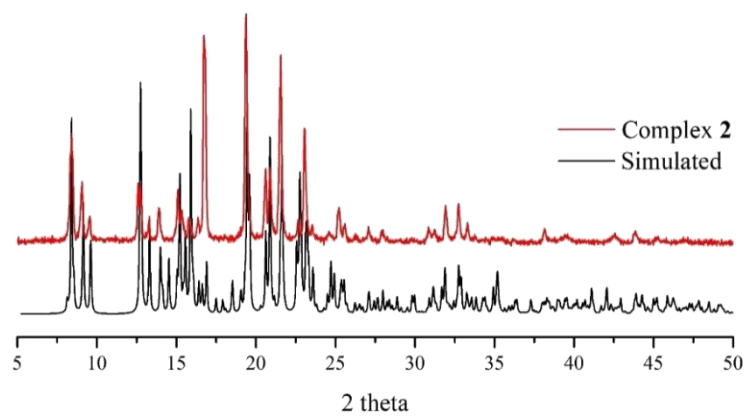

**Figure S3.** Simulated and experimental PXRD patterns of **3**.

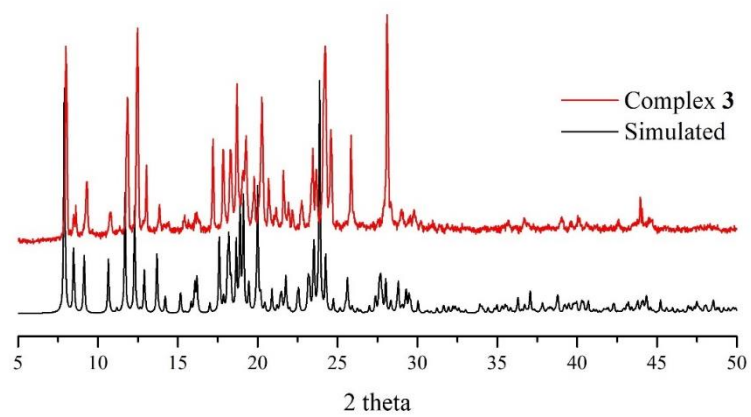

**Figure S4.** Simulated and experimental PXRD patterns of **4**.

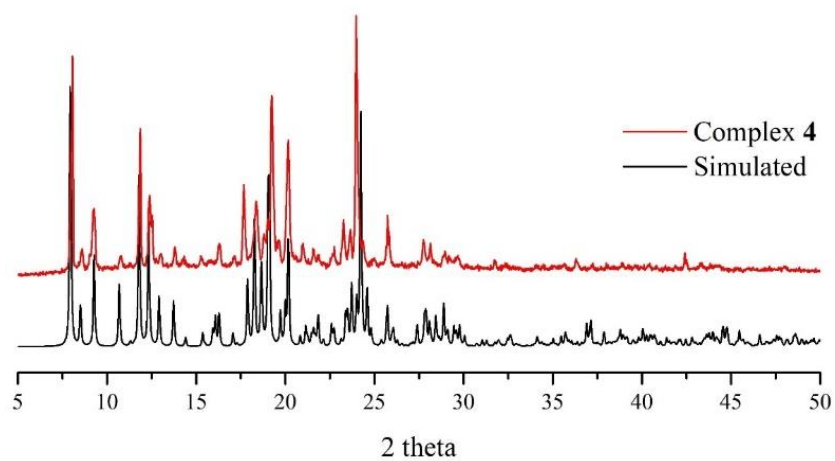

**Figure S5.** Simulated and experimental PXRD patterns of **5**.

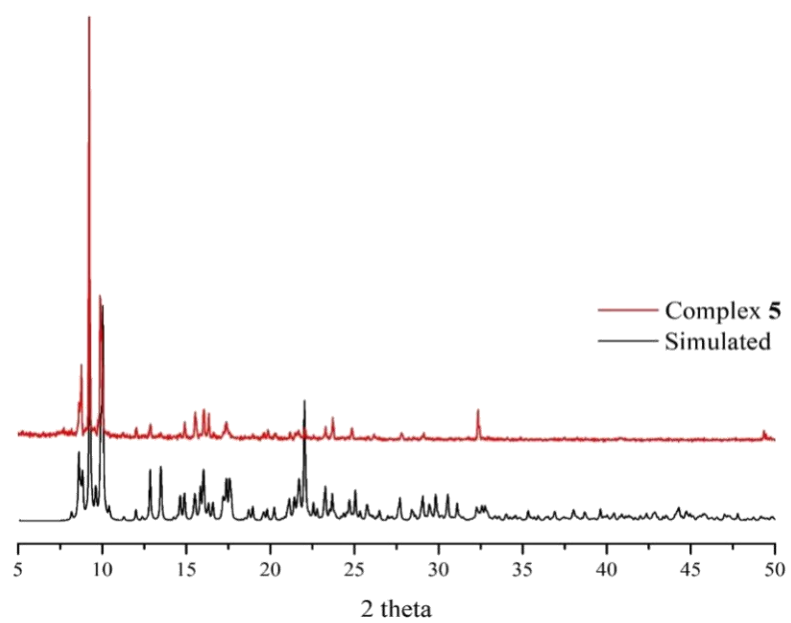

**Figure S6.** Simulated and experimental PXRD patterns of **6**.

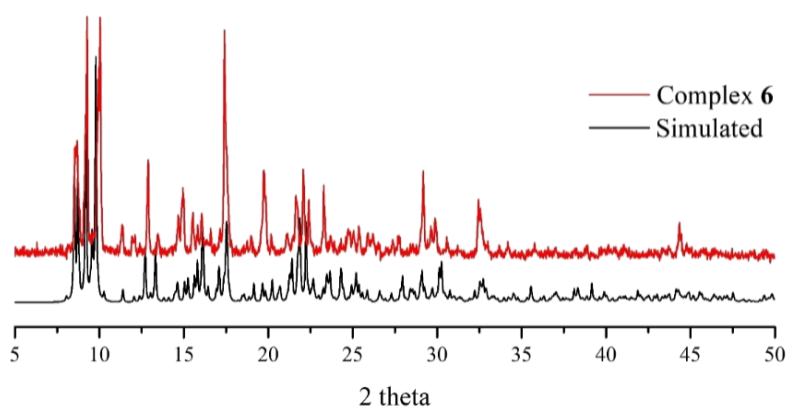

**Figure S7.** Simulated and experimental PXRD patterns of **7**.

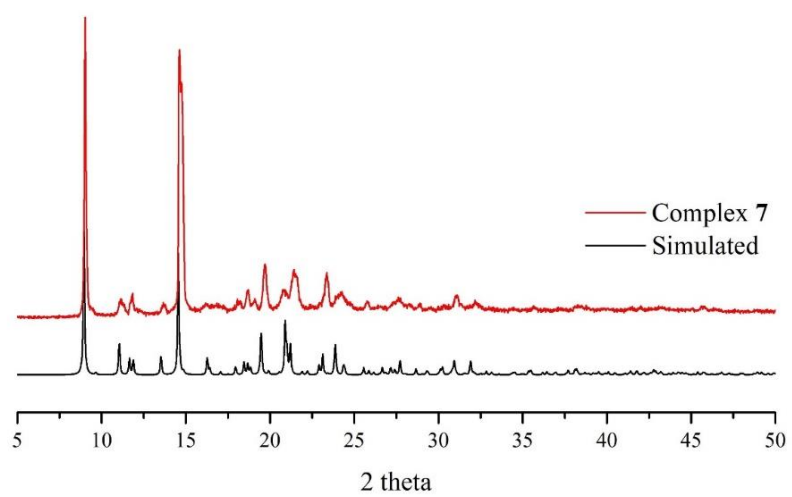



**Figure S8.** Simulated and experimental PXRD patterns of **8**.

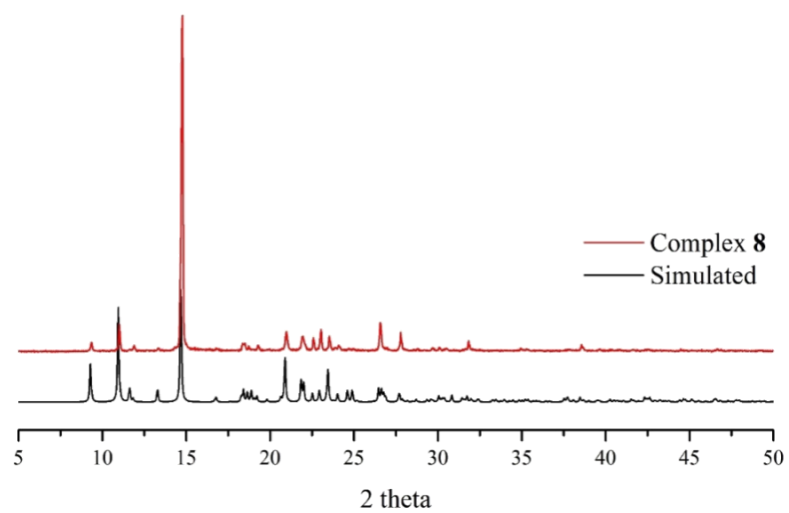

**Figure S9.** Simulated and experimental PXRD patterns of **9**.

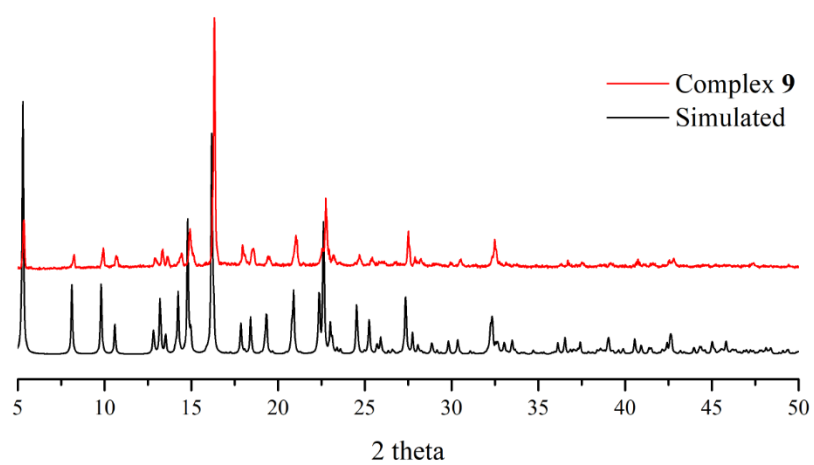

**Figure S10.** The TGA curve for complex **1**.

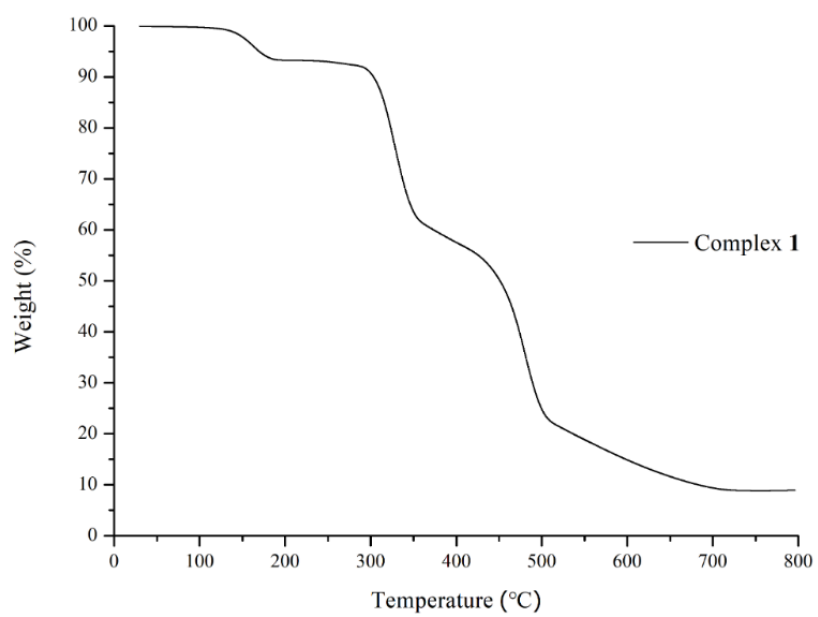

**Figure S11.** The TGA curve for complex **2**.

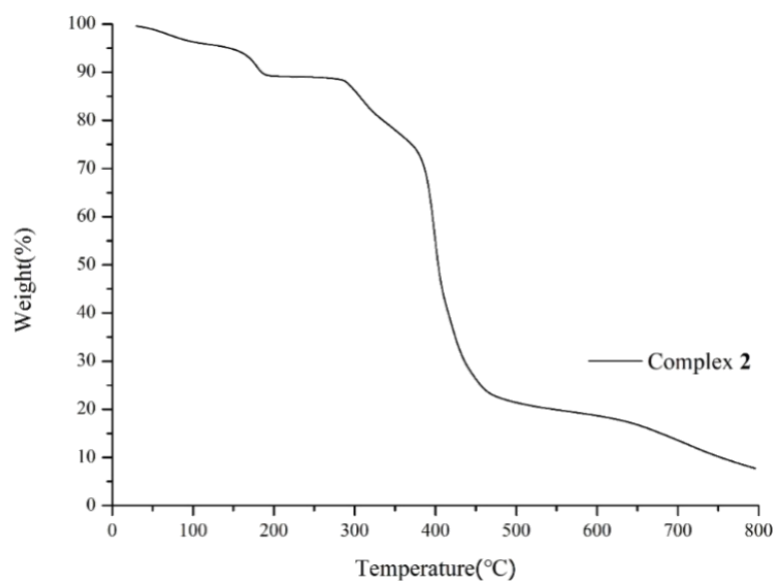

**Figure S12.** The TGA curve for complex **3**.

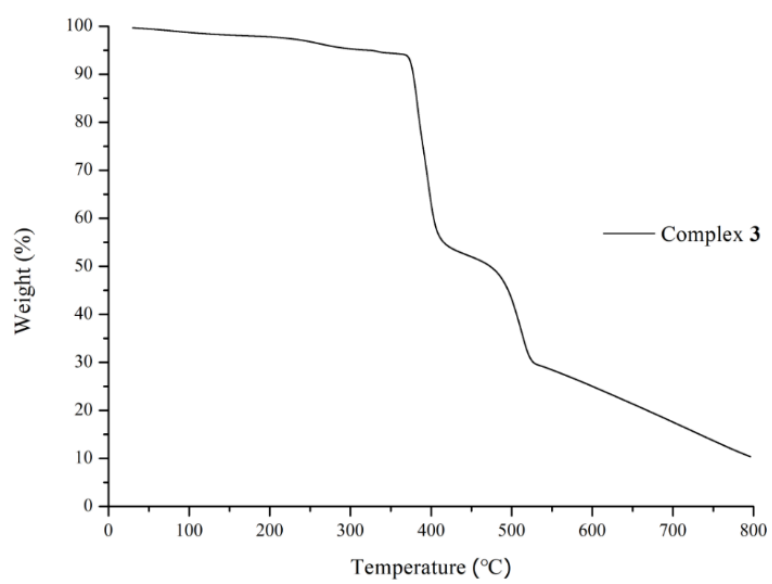

**Figure S13.** The TGA curve for complex **4**.

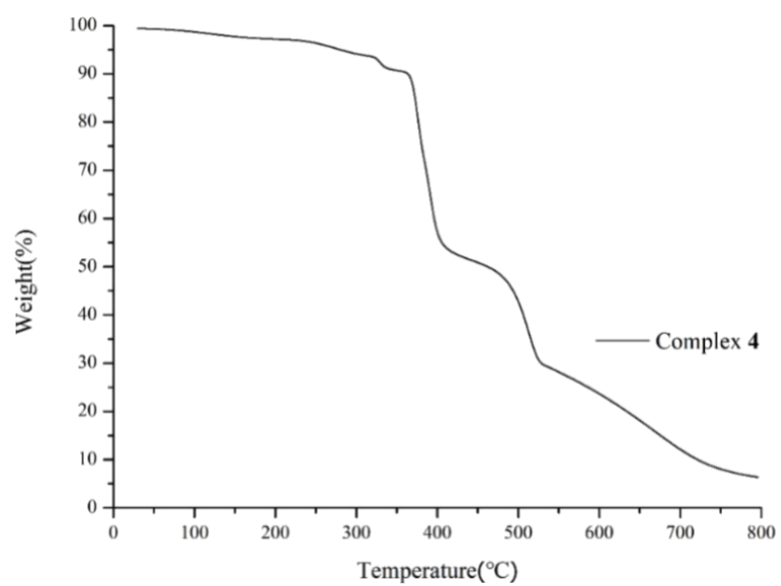

**Figure S14.** The TGA curve for complex **5**.

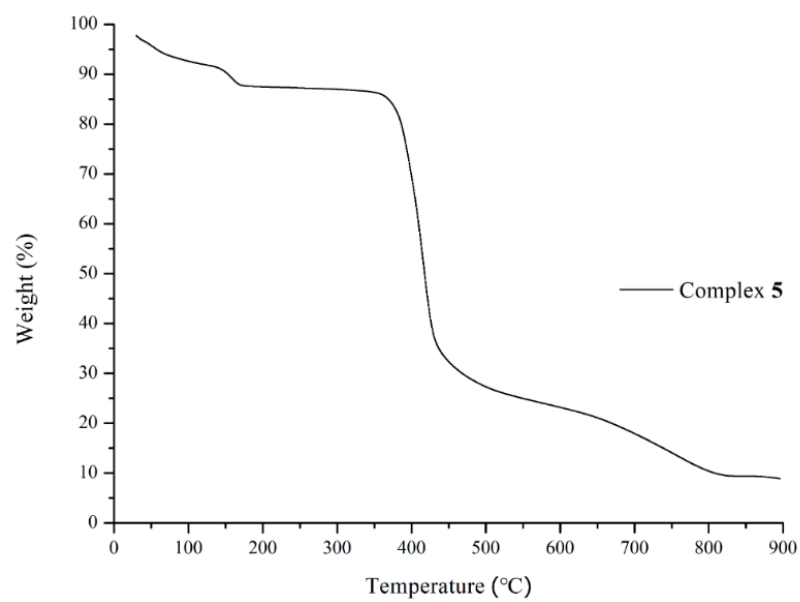

**Figure 15.** The TGA curve for complex **6**.

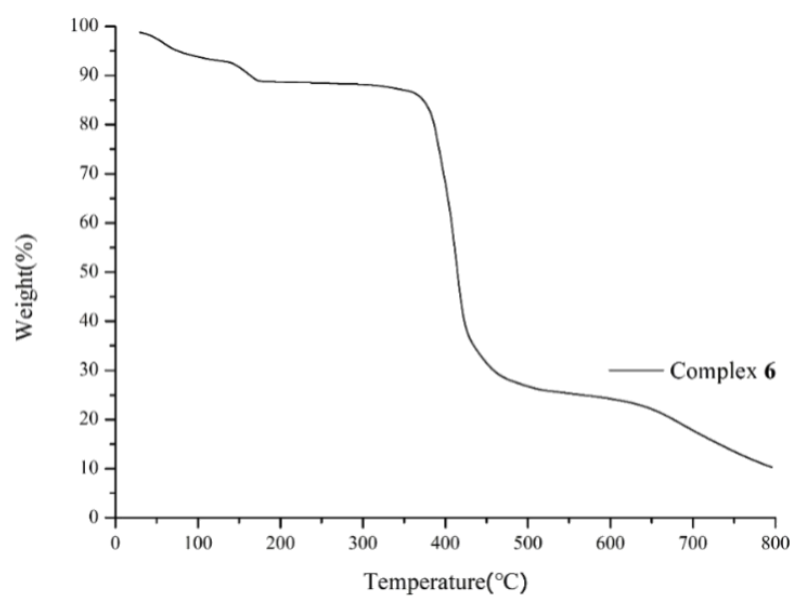



**Figure S16.** The TGA curve for complex **7**.

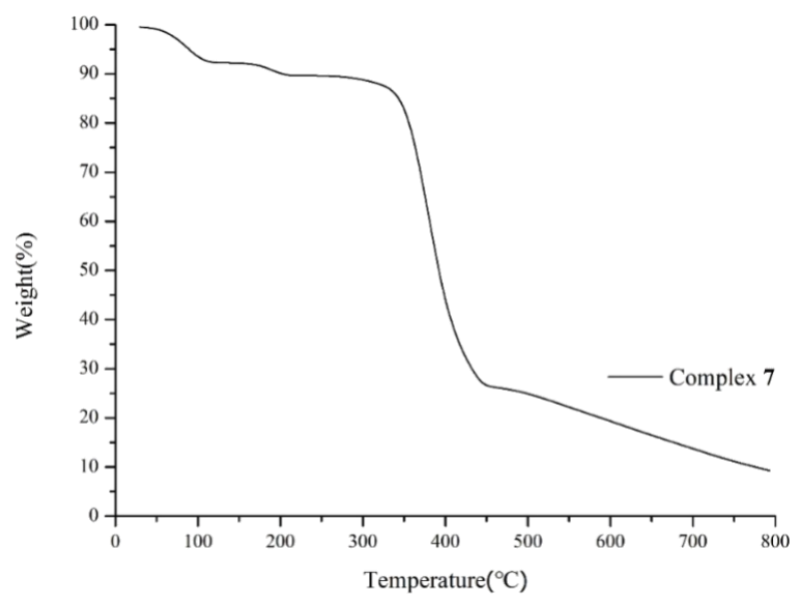

**Figure S17.** The TGA curve for complex **8**.

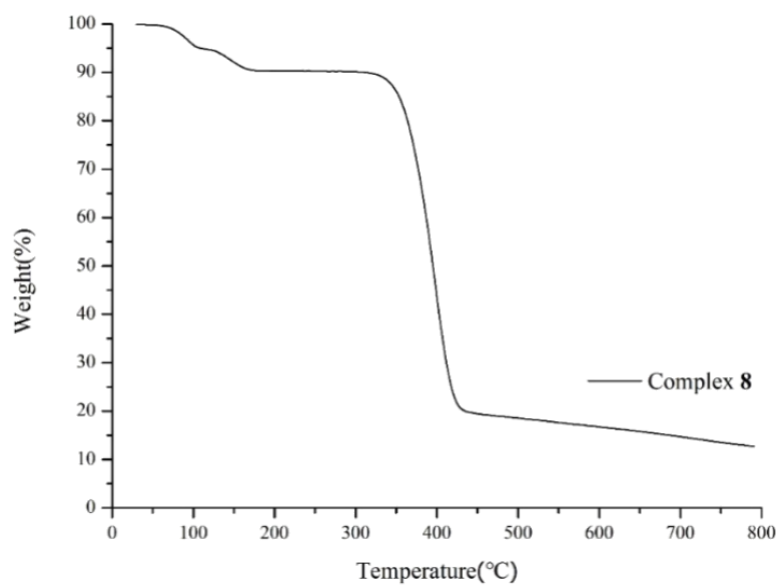

**Figure S18.** The TGA curve for complex **9**.

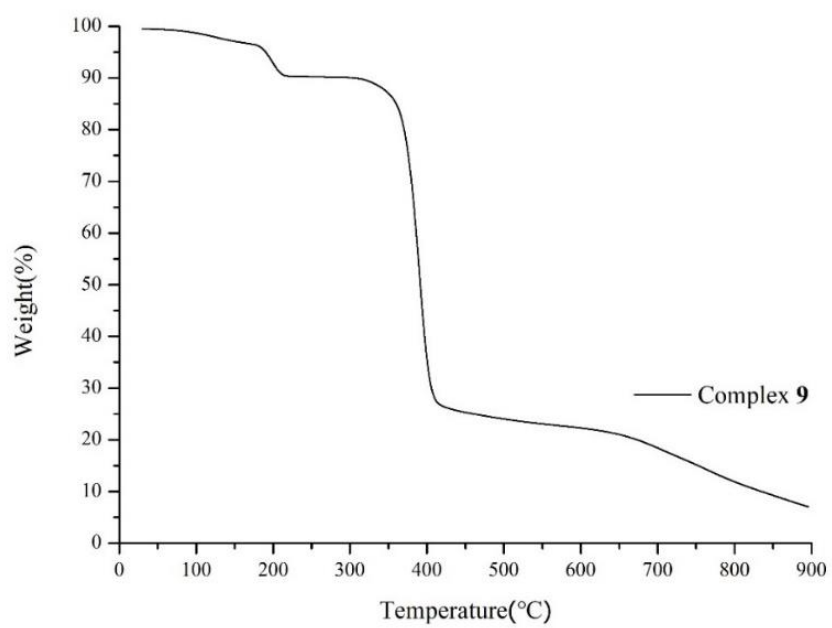

**Table S1.** Iodine adsorption experiments for complex **7** at 25 °C.

| adsorption<br>times<br>(min) | times | initial<br>weight<br>(mg) | final<br>weight<br>(mg) | Iodine<br>content<br>(mg) | Weight<br>change<br>(mg g <sup>-1</sup> ) | average<br>(mg g <sup>-1</sup> ) |
|------------------------------|-------|---------------------------|-------------------------|---------------------------|-------------------------------------------|----------------------------------|
| 30                           | 1     | 35.193                    | 35.201                  | 0.008                     | 0.227                                     | <b>0.208</b>                     |
|                              | 2     | 35.225                    | 35.232                  | 0.007                     | 0.199                                     |                                  |
|                              | 3     | 35.227                    | 35.232                  | 0.007                     | 0.199                                     |                                  |
| 60                           | 1     | 35.192                    | 35.206                  | 0.014                     | 0.398                                     | <b>0.379</b>                     |
|                              | 2     | 35.215                    | 35.228                  | 0.013                     | 0.369                                     |                                  |
|                              | 3     | 35.225                    | 35.238                  | 0.013                     | 0.369                                     |                                  |
| 120                          | 1     | 35.219                    | 35.237                  | 0.018                     | 0.511                                     | <b>0.521</b>                     |
|                              | 2     | 35.216                    | 35.238                  | 0.019                     | 0.540                                     |                                  |
|                              | 3     | 35.225                    | 35.243                  | 0.018                     | 0.511                                     |                                  |
| 180                          | 1     | 35.210                    | 35.290                  | 0.021                     | 0.596                                     | <b>0.587</b>                     |
|                              | 2     | 35.222                    | 35.305                  | 0.020                     | 0.568                                     |                                  |
|                              | 3     | 35.228                    | 35.249                  | 0.021                     | 0.596                                     |                                  |
| 360                          | 1     | 35.227                    | 35.249                  | 0.022                     | 0.625                                     | <b>0.606</b>                     |
|                              | 2     | 35.225                    | 35.246                  | 0.021                     | 0.596                                     |                                  |
|                              | 3     | 35.228                    | 35.249                  | 0.021                     | 0.596                                     |                                  |

**Table S2.** Iodine adsorption experiments for complex **7** at 60 °C.

| adsorption<br>times<br>(min) | times | initial<br>weight<br>(mg) | final<br>weight<br>(mg) | Iodine<br>content<br>(mg) | Weight<br>change<br>(mg g <sup>-1</sup> ) | average<br>(mg g <sup>-1</sup> ) |
|------------------------------|-------|---------------------------|-------------------------|---------------------------|-------------------------------------------|----------------------------------|
| 30                           | 1     | 35.201                    | 35.215                  | 0.014                     | 0.398                                     | <b>0.379</b>                     |
|                              | 2     | 35.222                    | 35.235                  | 0.013                     | 0.369                                     |                                  |
|                              | 3     | 35.221                    | 35.234                  | 0.013                     | 0.369                                     |                                  |
| 60                           | 1     | 35.180                    | 35.199                  | 0.019                     | 0.540                                     | <b>0.549</b>                     |
|                              | 2     | 35.281                    | 35.301                  | 0.020                     | 0.568                                     |                                  |
|                              | 3     | 35.262                    | 35.287                  | 0.019                     | 0.540                                     |                                  |
| 120                          | 1     | 35.180                    | 35.201                  | 0.021                     | 0.596                                     | <b>0.587</b>                     |
|                              | 2     | 35.281                    | 35.301                  | 0.020                     | 0.568                                     |                                  |
|                              | 3     | 35.262                    | 35.289                  | 0.021                     | 0.596                                     |                                  |
| 180                          | 1     | 35.197                    | 35.219                  | 0.022                     | 0.625                                     | <b>0.606</b>                     |
|                              | 2     | 35.288                    | 35.309                  | 0.021                     | 0.596                                     |                                  |
|                              | 3     | 35.268                    | 35.289                  | 0.021                     | 0.596                                     |                                  |
| 360                          | 1     | 35.240                    | 35.262                  | 0.022                     | 0.625                                     | <b>0.606</b>                     |
|                              | 2     | 35.240                    | 35.261                  | 0.021                     | 0.596                                     |                                  |
|                              | 3     | 35.262                    | 35.283                  | 0.021                     | 0.596                                     |                                  |

**Table S3.** Iodine adsorption experiments for complex **8** at 25 °C.

| adsorption<br>times<br>(min) | times | initial<br>weight<br>(mg) | final<br>weight<br>(mg) | Iodine<br>content<br>(mg) | Weight<br>change<br>(mg g <sup>-1</sup> ) | average<br>(mg g <sup>-1</sup> ) |
|------------------------------|-------|---------------------------|-------------------------|---------------------------|-------------------------------------------|----------------------------------|
| 30                           | 1     | 38.521                    | 38.522                  | 0.001                     | 0.258                                     | <b>0.258</b>                     |
|                              | 2     | 38.518                    | 38.519                  | 0.001                     | 0.258                                     |                                  |
|                              | 3     | 38.512                    | 38.513                  | 0.001                     | 0.258                                     |                                  |
| 60                           | 1     | 38.517                    | 38.519                  | 0.002                     | 0.519                                     | <b>0.606</b>                     |
|                              | 2     | 38.510                    | 38.512                  | 0.002                     | 0.519                                     |                                  |
|                              | 3     | 38.511                    | 38.514                  | 0.003                     | 0.779                                     |                                  |
| 120                          | 1     | 38.520                    | 38.524                  | 0.004                     | 1.038                                     | <b>0.952</b>                     |
|                              | 2     | 38.515                    | 38.519                  | 0.004                     | 1.038                                     |                                  |
|                              | 3     | 38.516                    | 38.519                  | 0.003                     | 0.779                                     |                                  |
| 180                          | 1     | 38.520                    | 38.525                  | 0.005                     | 1.298                                     | <b>1.298</b>                     |
|                              | 2     | 38.519                    | 38.524                  | 0.005                     | 1.298                                     |                                  |
|                              | 3     | 38.518                    | 38.523                  | 0.005                     | 1.298                                     |                                  |
| 360                          | 1     | 38.520                    | 38.525                  | 0.005                     | 1.298                                     | <b>1.385</b>                     |
|                              | 2     | 38.521                    | 38.527                  | 0.006                     | 1.558                                     |                                  |
|                              | 3     | 38.521                    | 38.527                  | 0.006                     | 1.558                                     |                                  |

**Table S4.** Iodine adsorption experiments for complex **8** at 60 °C.

| adsorption<br>times<br>(min) | times | initial<br>weight<br>(mg) | final<br>weight<br>(mg) | Iodine<br>content<br>(mg) | Weight<br>change<br>(mg g <sup>-1</sup> ) | average<br>(mg g <sup>-1</sup> ) |
|------------------------------|-------|---------------------------|-------------------------|---------------------------|-------------------------------------------|----------------------------------|
| 30                           | 1     | 38.521                    | 38.523                  | 0.002                     | 0.519                                     | <b>0.606</b>                     |
|                              | 2     | 38.518                    | 38.520                  | 0.002                     | 0.519                                     |                                  |
|                              | 3     | 38.512                    | 38.515                  | 0.003                     | 0.779                                     |                                  |
| 60                           | 1     | 38.517                    | 38.522                  | 0.005                     | 1.298                                     | <b>1.298</b>                     |
|                              | 2     | 38.515                    | 38.520                  | 0.005                     | 1.298                                     |                                  |
|                              | 3     | 38.511                    | 38.516                  | 0.005                     | 1.298                                     |                                  |
| 120                          | 1     | 38.520                    | 38.526                  | 0.006                     | 1.558                                     | <b>1.558</b>                     |
|                              | 2     | 38.515                    | 38.521                  | 0.006                     | 1.558                                     |                                  |
|                              | 3     | 38.516                    | 38.522                  | 0.006                     | 1.558                                     |                                  |
| 180                          | 1     | 38.520                    | 38.526                  | 0.006                     | 1.558                                     | <b>1.558</b>                     |
|                              | 2     | 38.521                    | 38.527                  | 0.006                     | 1.558                                     |                                  |
|                              | 3     | 38.522                    | 38.528                  | 0.006                     | 1.558                                     |                                  |
| 360                          | 1     | 38.520                    | 38.526                  | 0.006                     | 1.558                                     | <b>1.558</b>                     |
|                              | 2     | 38.520                    | 38.526                  | 0.006                     | 1.558                                     |                                  |
|                              | 3     | 38.521                    | 38.527                  | 0.006                     | 1.558                                     |                                  |

**Table S5.** Iodine adsorption experiments for complex **9** at 25 °C.

| adsorption<br>times<br>(min) | try | initial<br>weight<br>(mg) | final<br>weight<br>(mg) | Iodine<br>content<br>(mg) | Weight<br>change<br>(mg g <sup>-1</sup> ) | average<br>(mg g <sup>-1</sup> ) |
|------------------------------|-----|---------------------------|-------------------------|---------------------------|-------------------------------------------|----------------------------------|
| 30                           | 1   | 29.35                     | 29.98                   | 0.63                      | 21.45                                     | <b>22.73</b>                     |
|                              | 2   | 29.34                     | 30.02                   | 0.68                      | 23.18                                     |                                  |
|                              | 3   | 29.30                     | 29.99                   | 0.69                      | 23.55                                     |                                  |
| 60                           | 1   | 29.36                     | 31.15                   | 1.79                      | 60.97                                     | <b>63.72</b>                     |
|                              | 2   | 29.34                     | 31.33                   | 1.99                      | 67.83                                     |                                  |
|                              | 3   | 29.35                     | 31.18                   | 1.83                      | 62.35                                     |                                  |
| 120                          | 1   | 29.36                     | 32.83                   | 3.47                      | 118.19                                    | <b>118.93</b>                    |
|                              | 2   | 29.37                     | 32.88                   | 3.51                      | 119.51                                    |                                  |
|                              | 3   | 29.39                     | 32.89                   | 3.50                      | 119.09                                    |                                  |
| 180                          | 1   | 29.34                     | 34.08                   | 4.74                      | 161.55                                    | <b>159.75</b>                    |
|                              | 2   | 29.32                     | 34.01                   | 4.68                      | 159.62                                    |                                  |
|                              | 3   | 29.35                     | 33.99                   | 4.64                      | 158.09                                    |                                  |
| 360                          | 1   | 29.36                     | 34.15                   | 4.79                      | 163.15                                    | <b>163.14</b>                    |
|                              | 2   | 29.38                     | 34.18                   | 4.80                      | 163.38                                    |                                  |
|                              | 3   | 29.34                     | 34.10                   | 4.78                      | 162.92                                    |                                  |



**Table S6.** Iodine adsorption experiments for complex **9** at 60 °C.

| adsorption<br>times<br>(min) | try | initial<br>weight<br>(mg) | finial<br>weight<br>(mg) | Iodine<br>content<br>(mg) | Weight<br>change<br>(mg g <sup>-1</sup> ) | average<br>(mg g <sup>-1</sup> ) |
|------------------------------|-----|---------------------------|--------------------------|---------------------------|-------------------------------------------|----------------------------------|
| 30                           | 1   | 29.36                     | 32.50                    | 3.14                      | 106.94                                    | <b>107.92</b>                    |
|                              | 2   | 29.34                     | 32.47                    | 3.13                      | 106.68                                    |                                  |
|                              | 3   | 29.33                     | 32.56                    | 3.23                      | 110.13                                    |                                  |
| 60                           | 1   | 29.36                     | 33.52                    | 4.16                      | 141.69                                    | <b>140.64</b>                    |
|                              | 2   | 29.37                     | 33.49                    | 4.12                      | 140.28                                    |                                  |
|                              | 3   | 29.37                     | 33.58                    | 4.11                      | 139.94                                    |                                  |
| 120                          | 1   | 29.36                     | 34.15                    | 4.79                      | 163.15                                    | <b>161.30</b>                    |
|                              | 2   | 29.37                     | 34.06                    | 4.69                      | 159.69                                    |                                  |
|                              | 3   | 29.37                     | 34.12                    | 4.73                      | 161.05                                    |                                  |
| 180                          | 1   | 29.39                     | 34.25                    | 4.86                      | 165.36                                    | <b>165.15</b>                    |
|                              | 2   | 29.38                     | 34.26                    | 4.88                      | 166.10                                    |                                  |
|                              | 3   | 29.39                     | 34.21                    | 4.82                      | 164.00                                    |                                  |
| 360                          | 1   | 29.36                     | 34.25                    | 4.89                      | 166.55                                    | <b>166.55</b>                    |
|                              | 2   | 29.38                     | 34.28                    | 4.90                      | 166.78                                    |                                  |
|                              | 3   | 29.34                     | 34.20                    | 4.88                      | 166.33                                    |                                  |

**Figure S19.** Color changes of complex **7** heated at 25 and 60 °C: (a) without heating and heated for (b) 30, (c) 60, (d) 120, (e) 180 and (f) 360 minutes.

25 °C

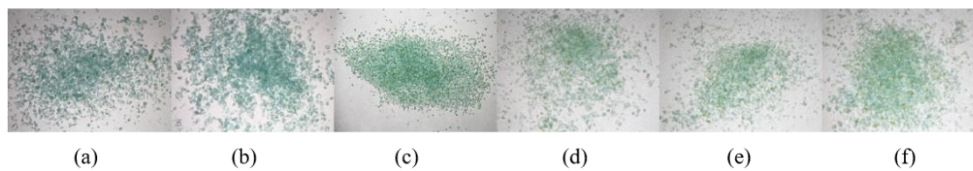

60 °C

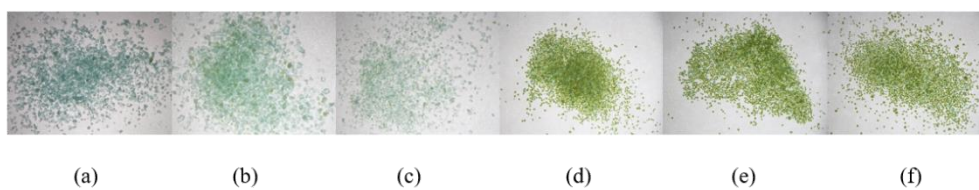

**Figure S20.** Color changes of complex **8** heated at 25 and 60 °C: (a) without heating and heated for (b) 30, (c) 60, (d) 120, (e) 180 and (f) 360 minutes.

25 °C

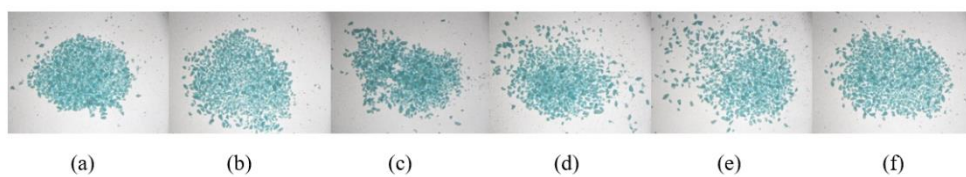

60 °C

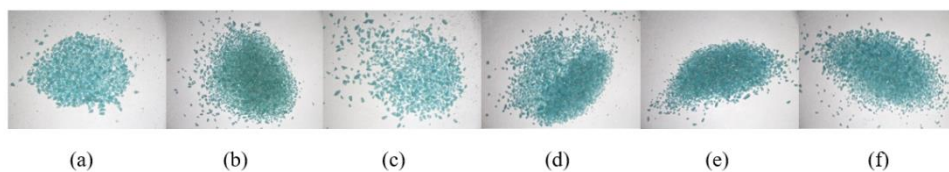

**Figure S21.** Color changes of complex **9** heated at 25 and 60 °C: (a) without heating and heated for (b) 30, (c) 60, (d) 120, (e) 180 and (f) 360 minutes.

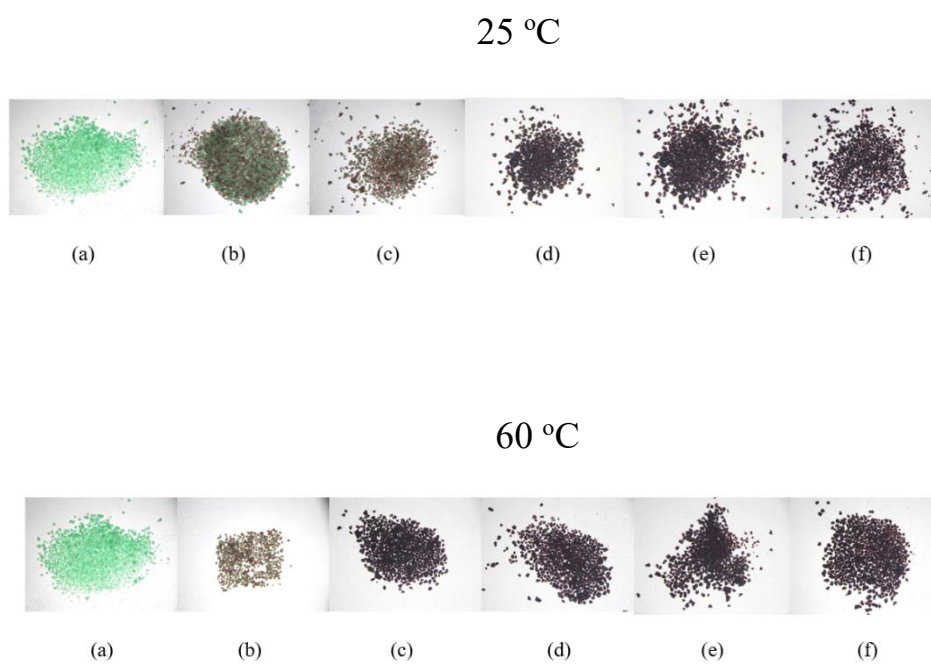

**Figure S22.** PXRD patterns of complex **7** after heated at (a) 25 and (b) 60 °C for various intervals.

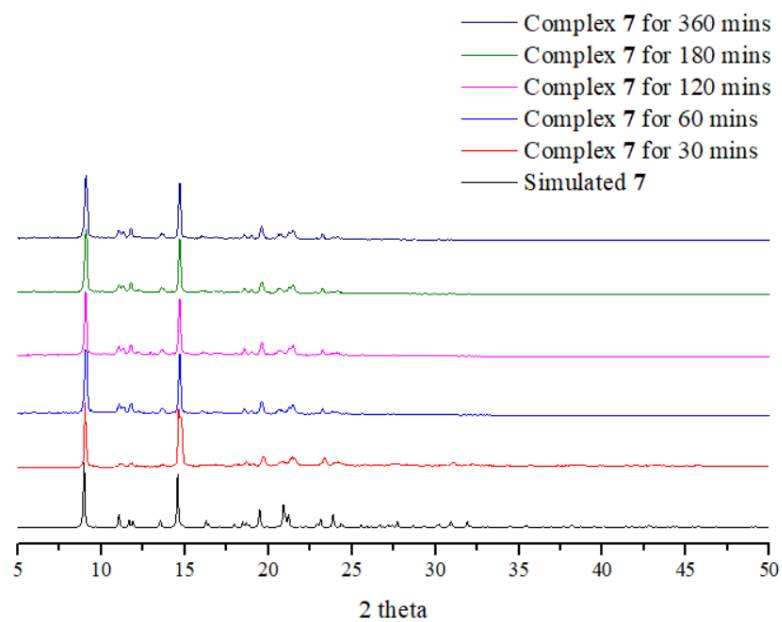

(a)

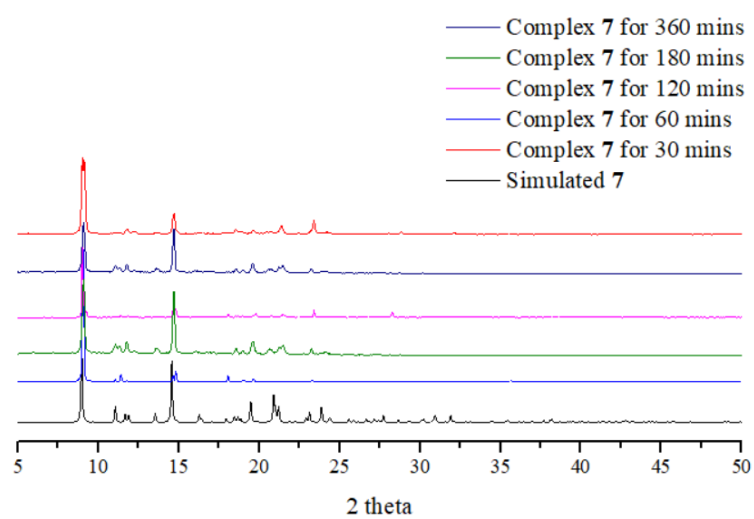

(b)

**Figure S23.** PXRD patterns of complex **8** after heated at (a) 25 and (b) 60 °C for various intervals.

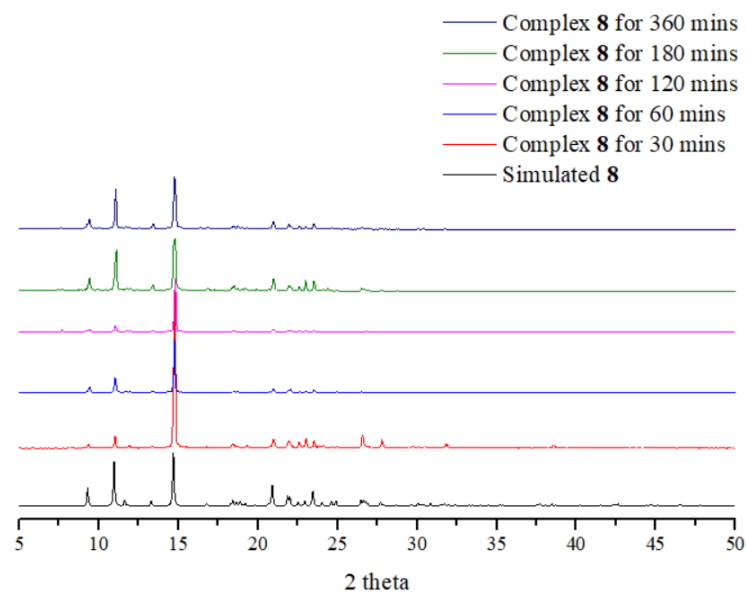

(a)

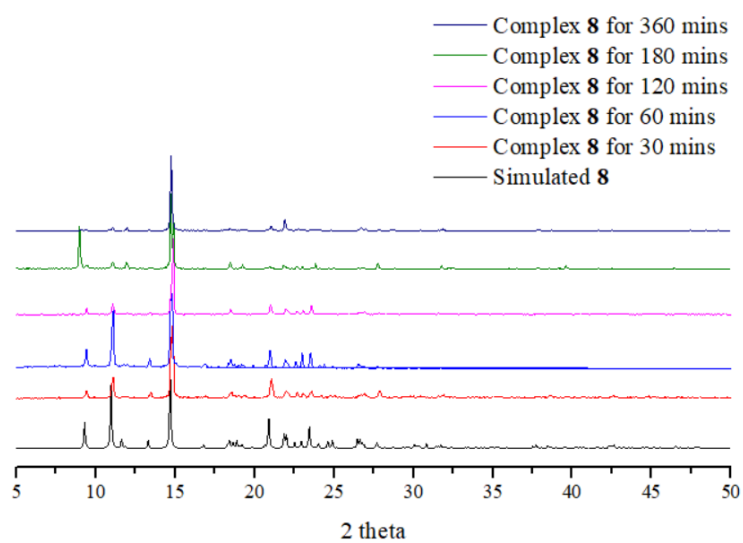

(b)

**Figure S24.** PXRD patterns of complex **9** after heated at (a) 25 and (b) 60 °C for various intervals.

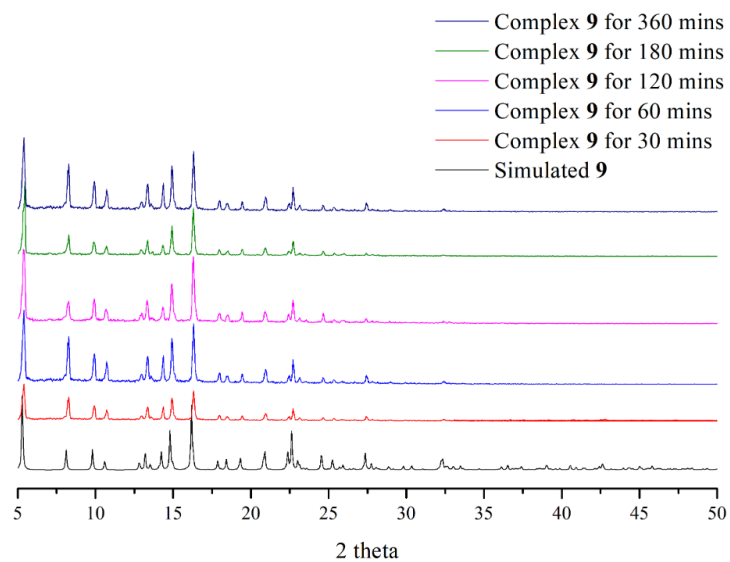

(a)

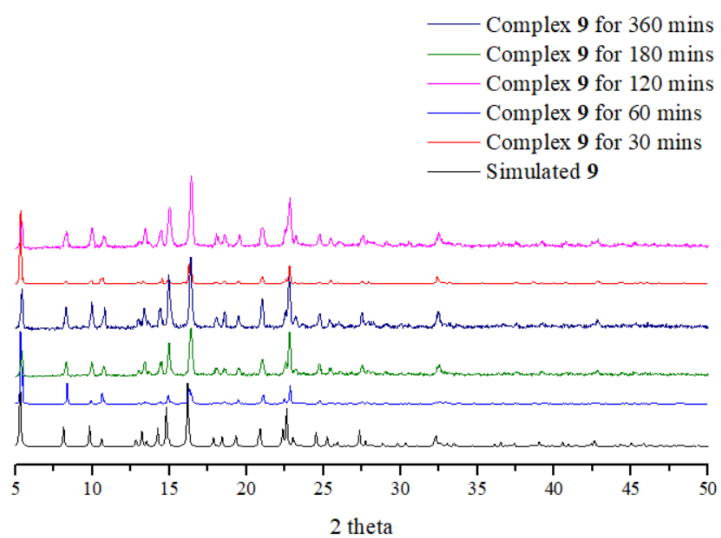

(b)

**Figure S25.** EDX data for complex **7** at three different regions.

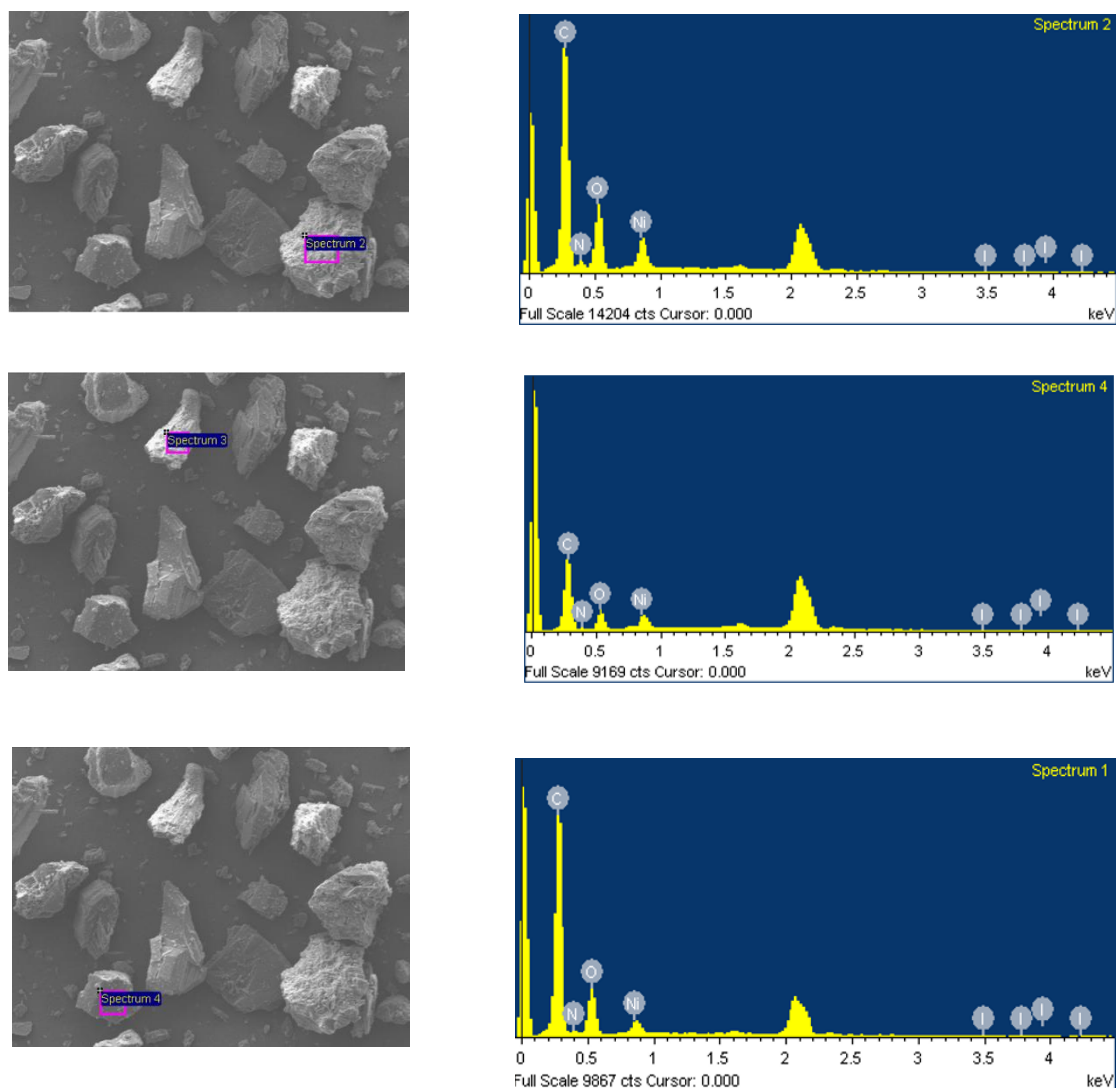

|         | 1st      |          | 2nd      |          | 3rd      |          |
|---------|----------|----------|----------|----------|----------|----------|
| Element | Weight % | Atomic % | Weight % | Atomic % | Weight % | Atomic % |
| C K     | 54.07    | 64.91    | 53.37    | 65.89    | 63.35    | 72.98    |
| N K     | 10.34    | 10.64    | 8.40     | 8.89     | 4.57     | 4.50     |
| O K     | 23.50    | 21.57    | 23.23    | 21.52    | 23.88    | 20.61    |
| Ni L    | 11.62    | 2.85     | 14.32    | 3.62     | 8.08     | 1.90     |
| I L     | 0.46     | 0.03     | 0.68     | 0.08     | 0.12     | 0.01     |
| Totals  | 100.00   |          | 100.00   |          | 100.00   |          |



**Figure S26.** EDX data for complex **8** at three different regions.

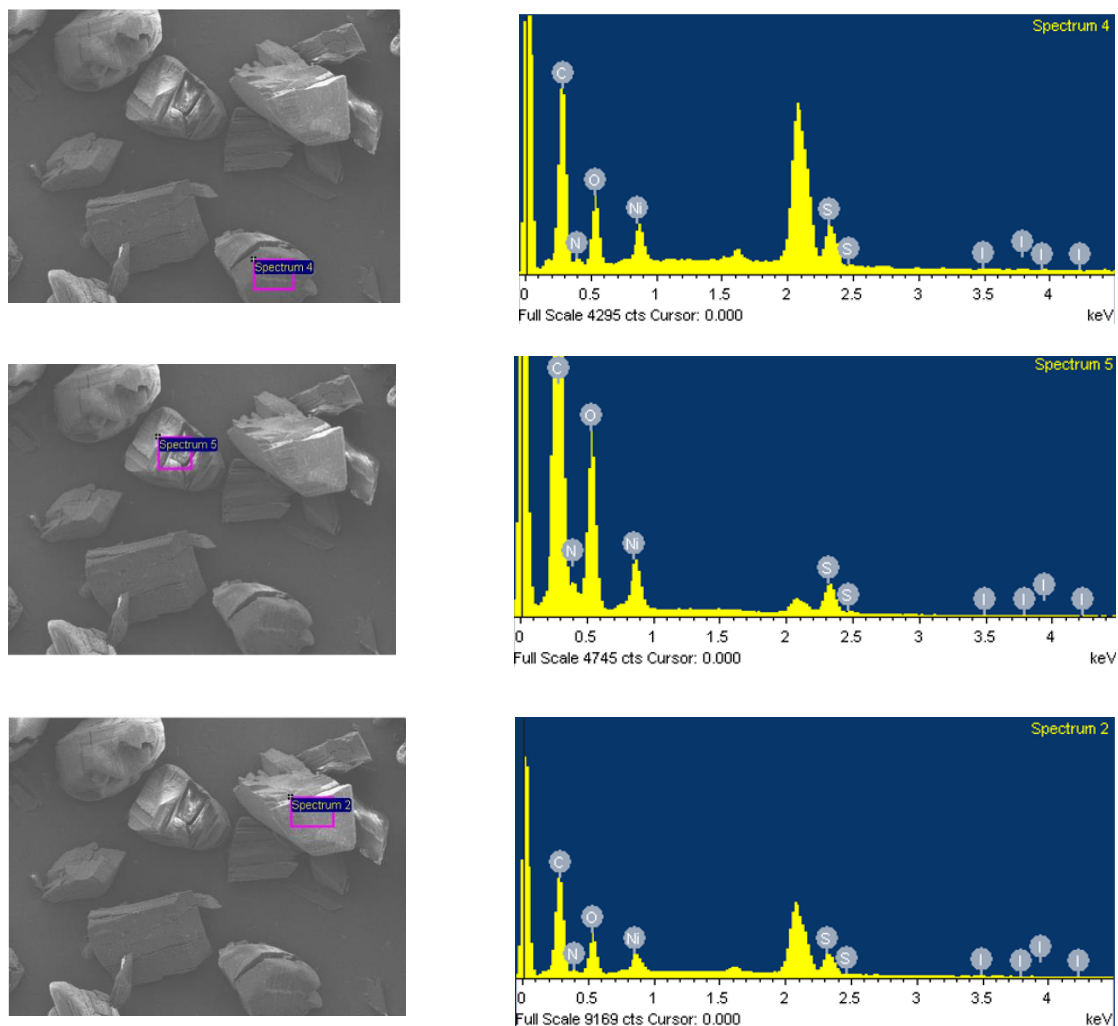

|         | 1st      |          | 2nd      |          | 3rd      |          |
|---------|----------|----------|----------|----------|----------|----------|
| Element | Weight % | Atomic % | Weight % | Atomic % | Weight % | Atomic % |
| C K     | 61.92    | 72.47    | 52.46    | 66.46    | 52.73    | 67.47    |
| N K     | 3.87     | 3.79     | 4.86     | 5.28     | 4.56     | 5.01     |
| O K     | 22.87    | 20.09    | 22.48    | 21.20    | 20.77    | 19.95    |
| S K     | 4.21     | 1.85     | 7.65     | 3.63     | 8.38     | 4.02     |
| Ni L    | 7.12     | 1.70     | 12.54    | 3.25     | 13.54    | 3.27     |
| I L     | 0.01     | 0.10     | 0.01     | 0.18     | 0.02     | 0.28     |
| Totals  | 100.00   |          | 100.00   |          | 100.00   |          |

**Figure S27.** EDX data for complex **9** at three different regions.

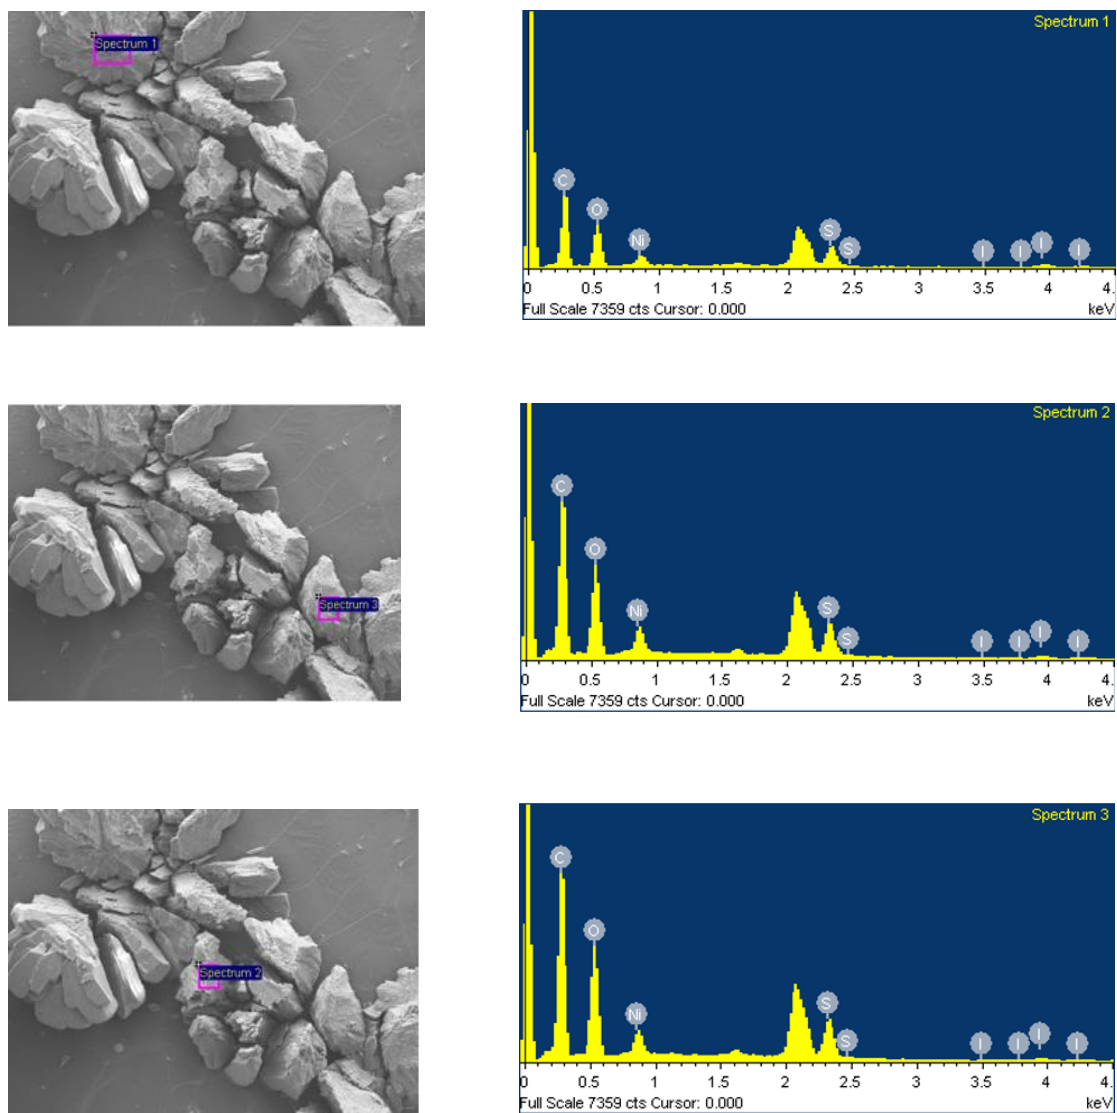

|         | 1st      |          | 2nd      |          | 3rd      |          |
|---------|----------|----------|----------|----------|----------|----------|
| Element | Weight % | Atomic % | Weight % | Atomic % | Weight % | Atomic % |
| C K     | 47.33    | 66.52    | 49.98    | 66.61    | 51.03    | 66.20    |
| O K     | 23.33    | 24.62    | 25.87    | 25.88    | 27.79    | 27.06    |
| S K     | 9.21     | 4.85     | 7.59     | 3.79     | 7.74     | 3.76     |
| Ni L    | 8.63     | 2.48     | 11.10    | 3.03     | 9.30     | 2.47     |
| I L     | 11.50    | 1.53     | 5.46     | 0.69     | 4.14     | 0.51     |
| Totals  | 100.00   |          | 100.00   |          | 100.00   |          |

**Figure S28.** Color changes of complex **1** heated at 25 and 60 °C: (a) without heating and heated for (b) 30, (c) 60, (d) 120, (e) 180 and (f) 360 minutes.

25 °C

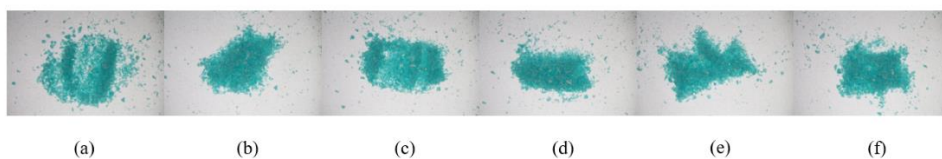

60 °C.

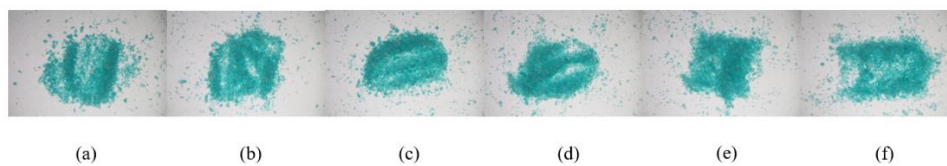

**Figure S29.** Color changes of complex **2** heated at 25 and 60 °C: (a) without heating and heated for (b) 30, (c) 60, (d) 120, (e) 180 and (f) 360 minutes.

25 °C

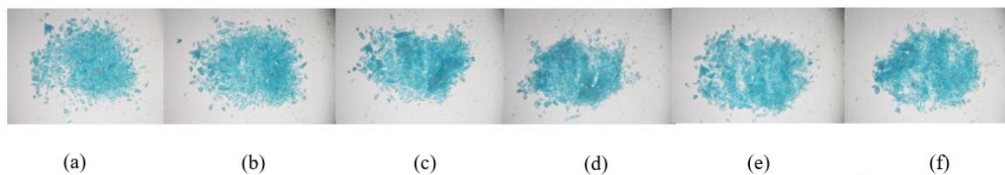

60 °C.

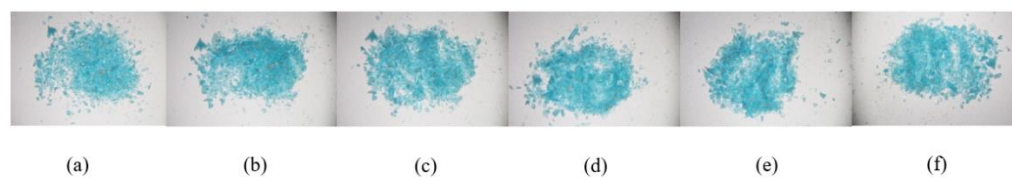

**Figure S30.** Color changes of complex **3** heated at 25 and 60 °C: (a) without heating and heated for (b) 30, (c) 60, (d) 120, (e) 180 and (f) 360 minutes.

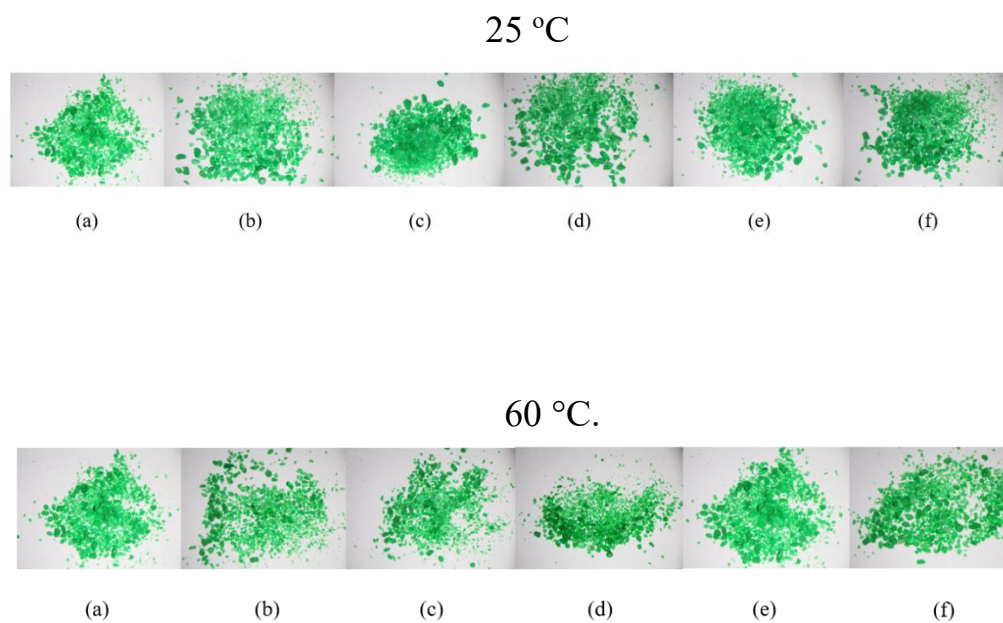

**Figure S31.** Color changes of complex **4** heated at 25 and 60 °C: (a) without heating and heated for (b) 30, (c) 60, (d) 120, (e) 180 and (f) 360 minutes.

25 °C

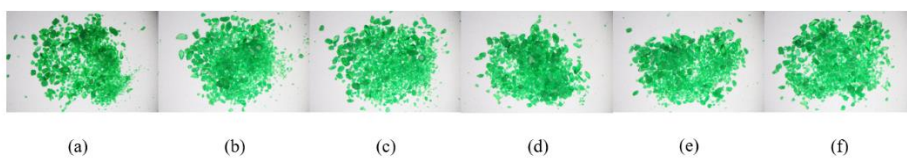

60 °C.

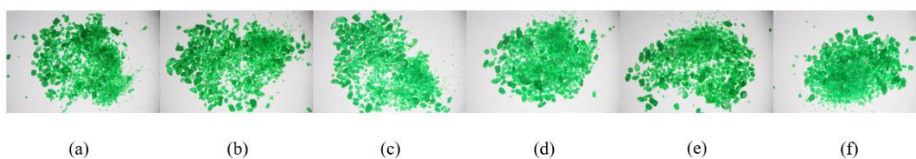

**Figure S32.** Color changes of complex **5** heated at 25 and 60 °C: (a) without heating and heated for (b) 30, (c) 60, (d) 120, (e) 180 and (f) 360 minutes.

25 °C

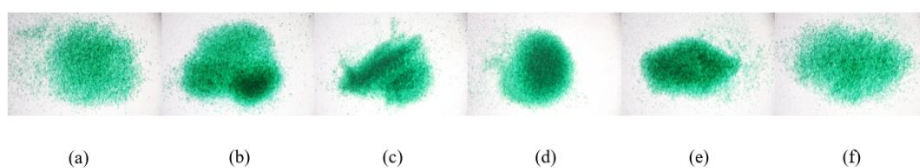

60 °C.

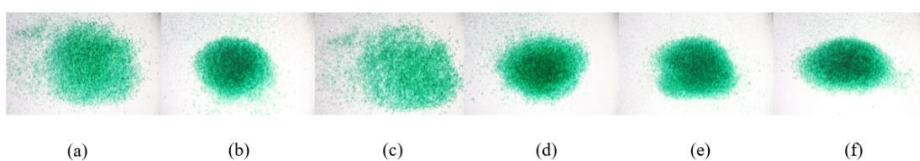

**Figure S33.** Color changes of complex **6** heated at 25 and 60 °C: (a) without heating and heated for (b) 30, (c) 60, (d) 120, (e) 180 and (f) 360 minutes.

25 °C

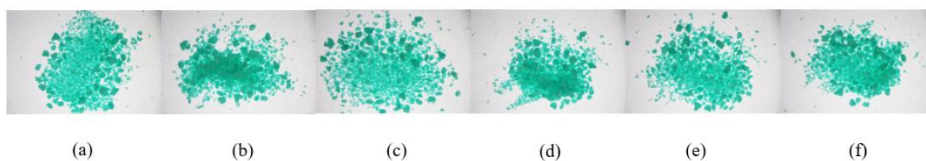

60 °C.

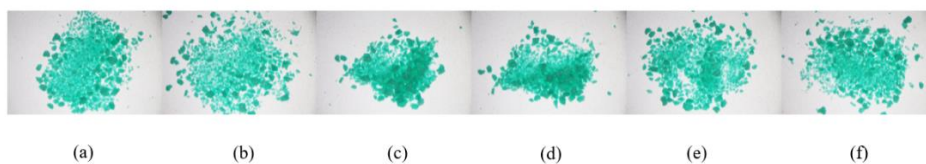



**Figure S34.** EDX data for iodine-adsorbed complex **1**.

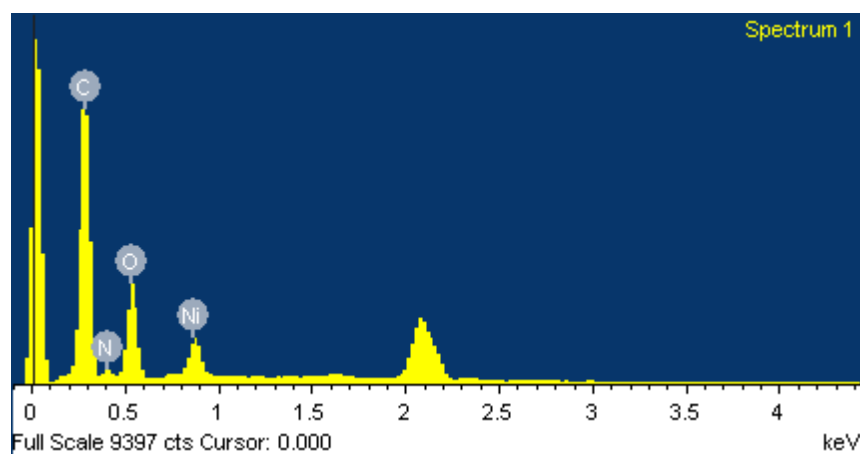

| Element | Weight% | Atomic% |
|---------|---------|---------|
| C K     | 52.41   | 64.68   |
| N K     | 7.19    | 7.60    |
| O K     | 25.99   | 24.08   |
| Ni L    | 14.41   | 3.64    |
| Totals  | 100.00  |         |

**Figure S35.** EDX data for iodine-adsorbed complex **2**.

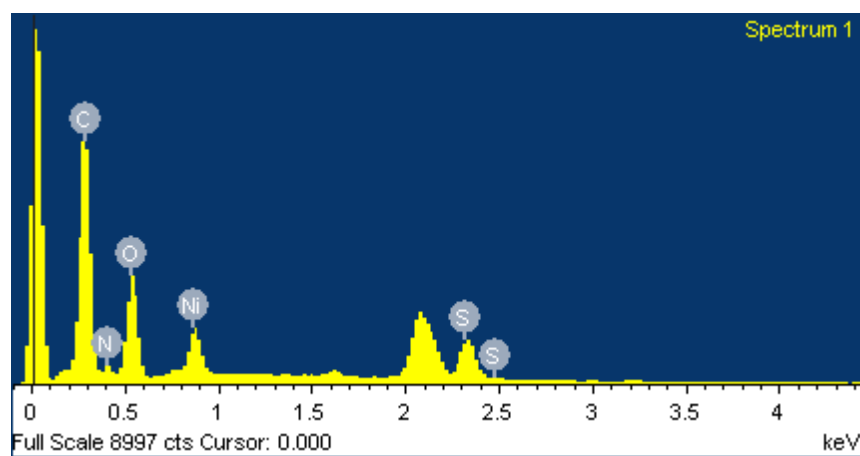

| Element | Weight% | Atomic% |
|---------|---------|---------|
| C K     | 49.88   | 63.50   |
| N K     | 7.35    | 8.03    |
| O K     | 23.04   | 22.02   |
| S K     | 6.09    | 2.90    |
| Ni L    | 13.64   | 3.55    |
| Totals  | 100.00  |         |

**Figure S36.** EDX data for iodine-adsorbed complex **3**.

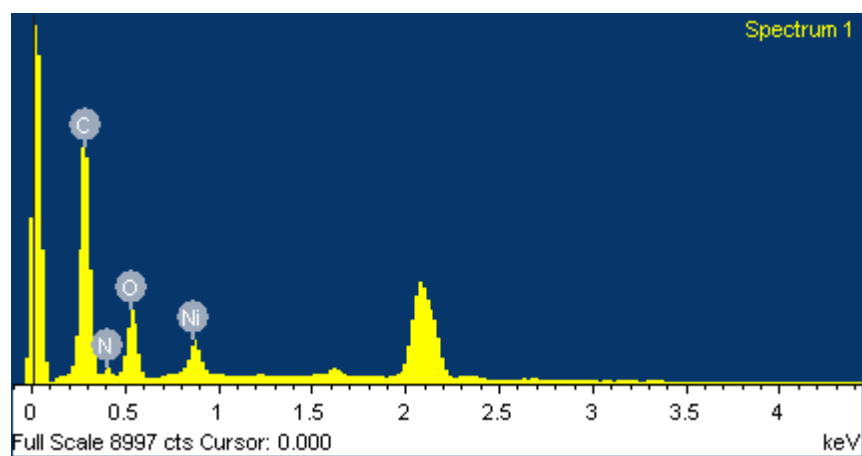

| Element | Weight% | Atomic% |
|---------|---------|---------|
| C K     | 52.28   | 64.75   |
| N K     | 9.29    | 9.86    |
| O K     | 23.14   | 21.51   |
| Ni L    | 15.30   | 3.88    |
| Totals  | 100.00  |         |

**Figure S37.** EDX data for iodine-adsorbed complex **4**.

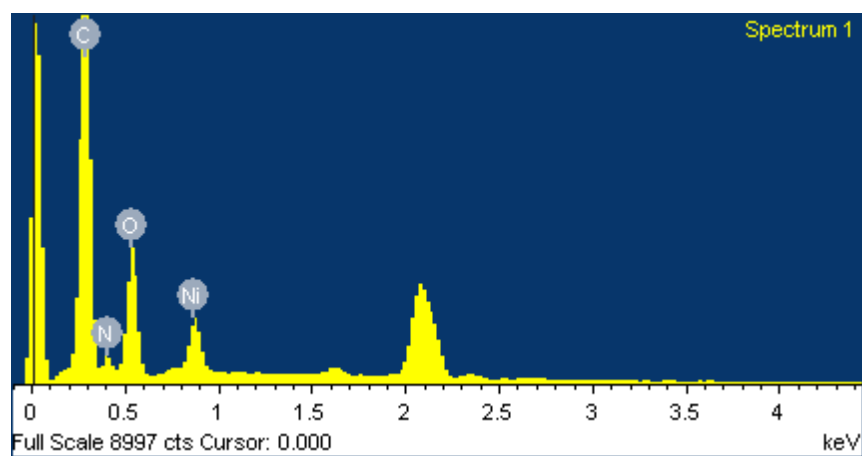

| Element | Weight% | Atomic% |
|---------|---------|---------|
| C K     | 52.92   | 64.62   |
| N K     | 9.35    | 9.79    |
| O K     | 24.25   | 22.23   |
| Ni L    | 13.48   | 3.37    |
| Totals  | 100.00  |         |

**Figure S38.** EDX data for iodine-adsorbed complex **5**.

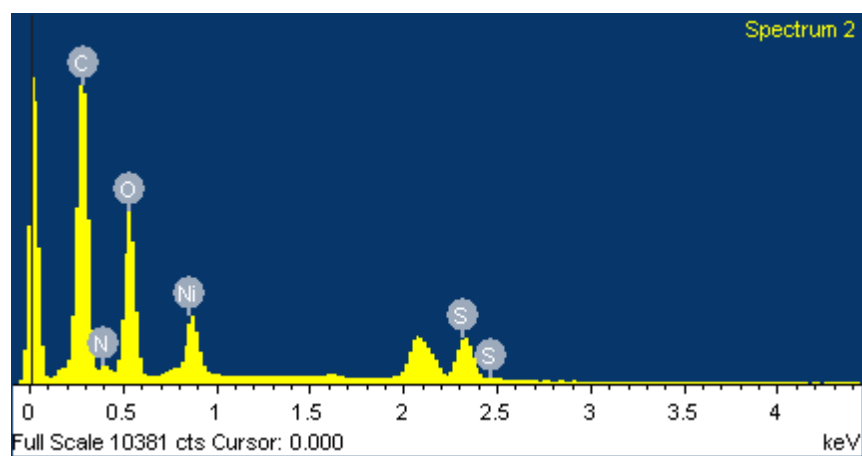

| Element | Weight% | Atomic% |
|---------|---------|---------|
| C K     | 47.72   | 61.13   |
| N K     | 5.61    | 6.16    |
| O K     | 27.67   | 26.62   |
| S K     | 5.08    | 2.44    |
| Ni L    | 13.92   | 3.65    |
| Totals  | 100.00  |         |

**Figure S39.** EDX data for iodine-adsorbed complex **6**.

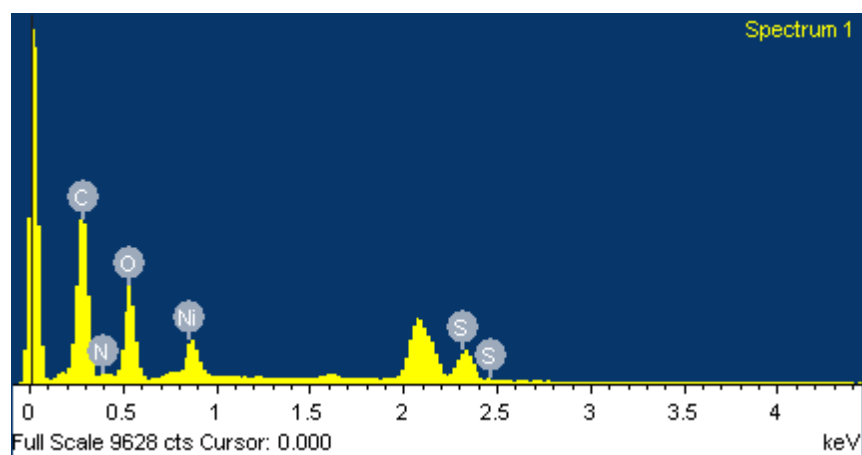

| Element | Weight% | Atomic% |
|---------|---------|---------|
| C K     | 48.32   | 62.53   |
| N K     | 4.28    | 4.74    |
| O K     | 26.50   | 25.75   |
| S K     | 6.58    | 3.19    |
| Ni L    | 14.33   | 3.79    |
| Totals  | 100.00  |         |

**Figure S40.** The N<sub>2</sub> adsorption for complex **7** at 77 K.

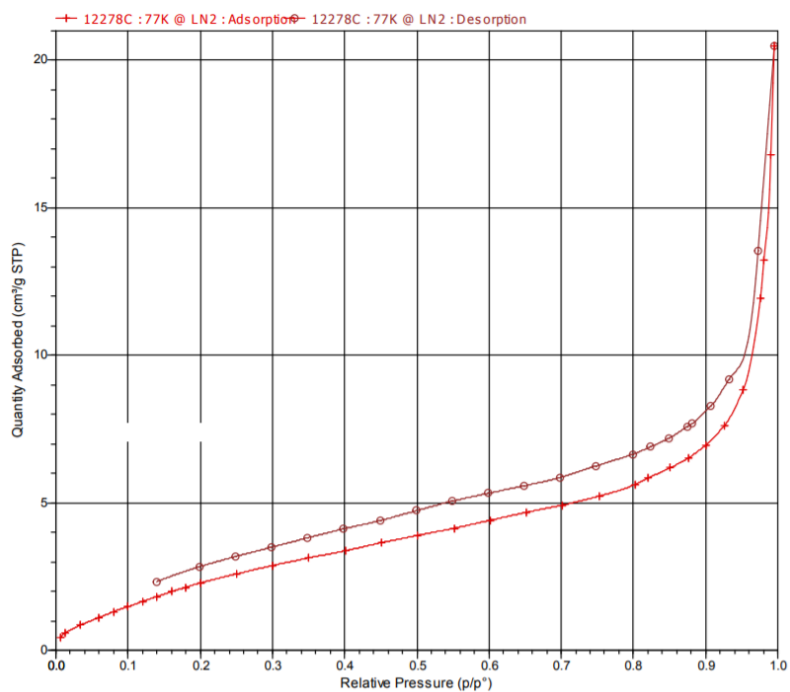

**Figure S41.** The N<sub>2</sub> adsorption for complex **8** at 77 K.

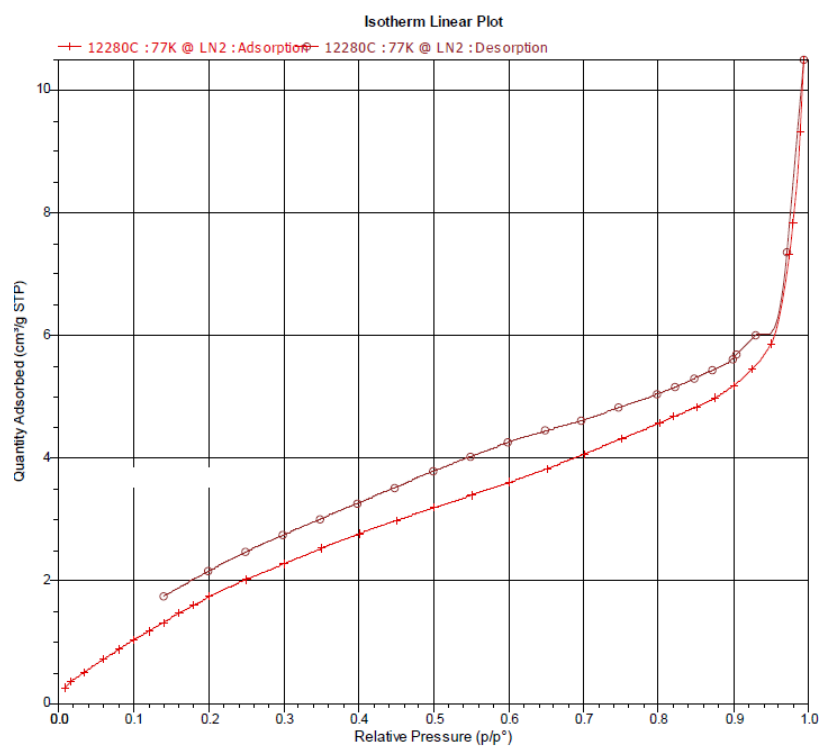



**Figure S42.** The N<sub>2</sub> adsorption for complex **9** at 77 K.

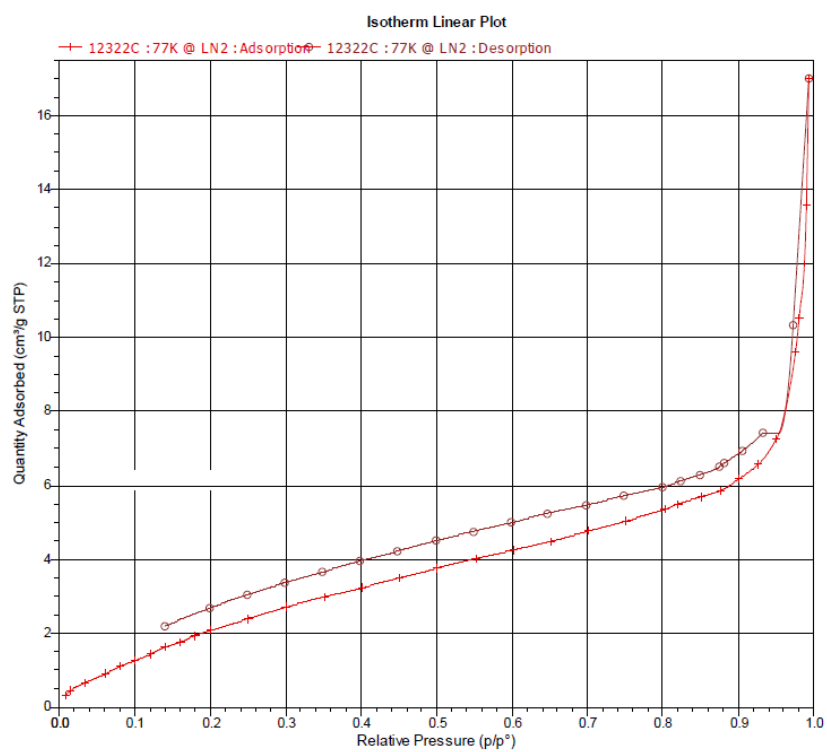

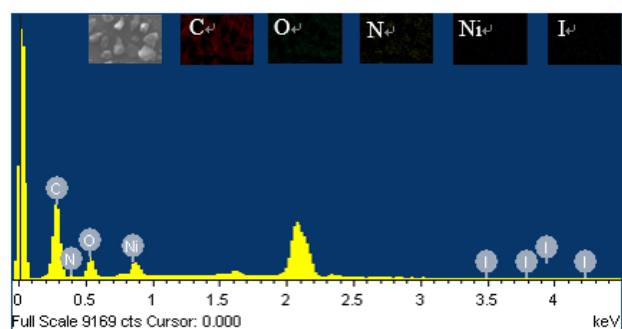

(a)

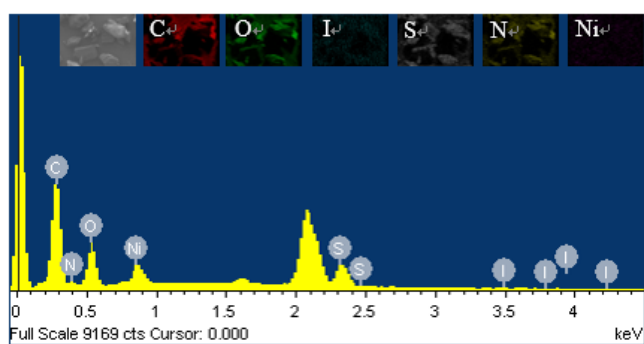

(b)

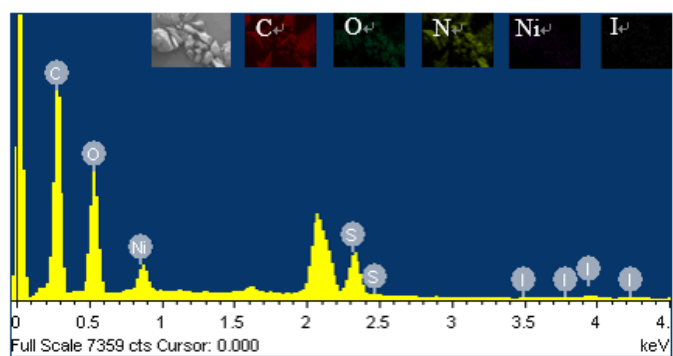

**Table S7.** Solvent accessible volumes of complexes **1** – **9**.

|          | Solvent assemble volume % |
|----------|---------------------------|
| <b>1</b> | 3.2                       |
| <b>2</b> | 12.6                      |
| <b>3</b> | 10.4                      |
| <b>4</b> | 10.2                      |
| <b>5</b> | 15.2                      |
| <b>6</b> | 15.6                      |
| <b>7</b> | 6.9                       |
| <b>8</b> | 9.3                       |
| <b>9</b> | 13.7                      |
